# Supplementary material for: The Utilization of Early Outpatient Care for Infants Following NICU Discharge among a National Sample
Source: MDPI journal article supplement (doi:10.3390/children11050550), 2024-05-04
Supplement: s1 [file s1]

**Table S1: MarketScan Data Dictionary Codes for Provider Type and Place of Service**

|                                           | MarketScan Codes   |
|-------------------------------------------|--------------------|
| Pediatrician                              | 400                |
| Subspecialty <sup>1</sup>                 |                    |
| Pediatric subspecialist                   | 410-460            |
| Other non-pediatric subspecialists        | 210-380            |
| Surgeons                                  | 500-585            |
| Family practitioner                       | 240                |
| Other MD                                  |                    |
| Medical Doctor                            | 200                |
| Osteopathic Medicine                      | 202                |
| Internal Medicine                         | 204                |
| MultiSpecialty Physician Group            | 206                |
| Non-physician services                    |                    |
| Laboratory                                | 930                |
| Imaging                                   | 160, 180, 185, 925 |
| Pharmacy                                  | 840 ,935           |
| Physical therapists (or other therapists) | 850-855            |
| Supply center                             | 940                |
| Hospice facility                          | 38                 |
| Renal dialysis                            | 857                |
| Home health care/nursing                  | 822, 920, 950      |
| Settings where services occurred          |                    |
| Patient home                              | 12                 |
| Office                                    | 11                 |
| Outpatient Hospital-Off Campus            | 19                 |
| Outpatient Hospital-On Campus             | 22                 |
| Acute care hospital                       | 1                  |
| Rural Health Clinic                       | 72                 |
| Outpatient not specified                  | 95                 |
| Urgent Care Facility /Emergency Room      | 20, 23             |
| Pharmacy                                  | 1, 98              |
| Independent Laboratory                    | 81                 |

<sup>1</sup>, Subspecialists includes both pediatric and non-pediatric subspecialists including pulmonology, cardiology, ophthalmology, surgeons, gastroenterology, genetics, otolaryngology, neonatal-perinatal medicine, hematology-oncology, infectious disease, urology
